# Supplementary material
Source: publisher figshare collection journal article supplement (https://tandf.figshare.com/ndownloader/files/14326868)
Supplement: Supplementary file 1 [file 14326868]

# Application of the NIOSH occupational exposure banding process to Bisphenol A: A case study

## Supplemental Tables

**Table S1.** Draft NIOSH Tier 1 Banding Criteria: GHS Hazard Codes and Categories

| Endpoint                                           | Endpoint Band                                                                                |                                                        |                                                          |
|----------------------------------------------------|----------------------------------------------------------------------------------------------|--------------------------------------------------------|----------------------------------------------------------|
|                                                    | C                                                                                            | D                                                      | E                                                        |
| Acute Toxicity                                     | H301, Cat. 3<br>H302, Cat. 4<br>H331, Cat. 3<br>H332, Cat. 4<br>H311, Cat. 3<br>H312, Cat. 4 | H300, Cat. 2<br>H330, Cat. 2<br>H310, Cat. 2           | H300, Cat. 1<br>H330, Cat. 1<br>H310, Cat. 1             |
| Skin Corrosion/Irritation                          | H315, Cat. 2                                                                                 | none                                                   | H314, Cat. 1, 1A, 1B or 1C                               |
| Eye Damage/Irritation                              | H319, Cat. 2, 2A, or 2B                                                                      | none                                                   | H318, Cat. 1                                             |
| Respiratory and Skin Sensitization                 | Skin: H317, Cat. 1B                                                                          | Skin: H317, Cat. 1 or 1A<br>Respiratory: H334, Cat. 1B | Skin: none<br>Respiratory: H334, Cat. 1 or 1A            |
| Germ Cell Mutagenicity                             | none                                                                                         | H341, Cat. 2                                           | H340, Cat. 1, 1A or 1B                                   |
| Carcinogenicity                                    | none                                                                                         | None                                                   | H350, Cat. 1, 1A or 1B<br>H351, Cat. 2                   |
| Reproductive Toxicity                              | H361 (excluding H361f, H361d, and H361fd), Cat. 2                                            | H360 (including H360f, H360d, and H360fd), Cat. 1B     | H360 (including H360f, H360d, and H360 fd), Cat. 1 or 1A |
| Specific Target Organ Toxicity – Repeated Exposure | H371, Cat. 2<br>H373, Cat. 2                                                                 | None                                                   | H370, Cat. 1<br>H372, Cat. 1                             |

**Cat:** Category; **GHS:** Globally Harmonized System of Classification and Labelling;

**Table S2.** Draft NIOSH Tier 2 Banding Criteria: Acute Toxicity

| Exposure/Dosing Route                            | Endpoint Band |                   |                |               |       |
|--------------------------------------------------|---------------|-------------------|----------------|---------------|-------|
|                                                  | A             | B                 | C              | D             | E     |
| Oral (LD <sub>50</sub> ), mg/kg-bw               | >2000         | >300 to ≤2000     | >50 to ≤300    | >5 to ≤50     | ≤5    |
| Dermal (LD <sub>50</sub> ), mg/kg-bw             | >2000         | >1000 to ≤2000    | >200 to ≤1000  | >50 to ≤200   | ≤50   |
| Inhalation, gases (LC <sub>50</sub> ), ppmv/4 h  | >20,000       | >2,500 to ≤20,000 | >500 to ≤2,500 | >100 to ≤500  | ≤100  |
| Inhalation, vapors (LC <sub>50</sub> ), mg/L/4 h | >20           | >10 to ≤20        | >2 to ≤10      | >0.5 to ≤2.0  | ≤0.5  |
| Inhalation, dusts and mists (LC <sub>50</sub> )  | >5            | >1 to ≤5          | >0.5 to ≤1     | >0.05 to ≤0.5 | ≤0.05 |

**bw:** body weight; **LD<sub>50</sub>:** lethal dose 50%; **LC<sub>50</sub>:** lethal concentration 50%;

**Table S3.** Draft NIOSH Tier 2 Banding Criteria: Skin Corrosion/Irritation

|                                   | Endpoint Band  |                             |                                                                   |                                                               |
|-----------------------------------|----------------|-----------------------------|-------------------------------------------------------------------|---------------------------------------------------------------|
|                                   | A              | B                           | C                                                                 | E                                                             |
| Skin Corrosion/Irritation Results | Non-irritating | Mild to moderate irritation | Moderate to severe irritation;<br>reversible direct effects<br>OR | Skin corrosion;<br>irreversible effects<br><br>pH ≤2 or >11.5 |

# Application of the NIOSH occupational exposure banding process to Bisphenol A: A case study

|  |  |  |                                                               |  |
|--|--|--|---------------------------------------------------------------|--|
|  |  |  | Mixed results or irritant potential with unspecified severity |  |
|--|--|--|---------------------------------------------------------------|--|

**Table S4.** Draft NIOSH Tier 2 Banding Criteria: Eye Damage/Irritation

|                               | Endpoint Band               |                                                                                                                               |                         |
|-------------------------------|-----------------------------|-------------------------------------------------------------------------------------------------------------------------------|-------------------------|
|                               | A                           | C                                                                                                                             | E                       |
| Eye Damage/Irritation Results | Mild to moderate irritation | Severe irritation; moderate to severe irritation<br>OR<br>Irritant with unspecified severity, no conclusion, or mixed results | Irreversible eye damage |

**Table S5.** Draft NIOSH Tier 2 Banding Criteria: Respiratory Sensitization

|                                   | Endpoint Band |       |          |
|-----------------------------------|---------------|-------|----------|
|                                   | A             | C     | D        |
| Respiratory Sensitization Results | No evidence   | Mixed | Positive |

**Table S6.** Draft NIOSH Tier 2 Banding Criteria: Skin Sensitization

| Test Type    | Endpoint Band                         |                                                                                                                                                              |                                                                                                                                                                     |
|--------------|---------------------------------------|--------------------------------------------------------------------------------------------------------------------------------------------------------------|---------------------------------------------------------------------------------------------------------------------------------------------------------------------|
|              | A                                     | C                                                                                                                                                            | E                                                                                                                                                                   |
| LLNA EC3 (%) | Non-skin sensitizer                   | >2.0 to ≤100<br>(weak to moderate skin sensitizer)                                                                                                           | ≤2.0<br>(strong to extreme skin sensitizer)                                                                                                                         |
| GPMT         | No positive response or low incidence | 30-60% of test animals respond at >0.1% intradermal induction concentration<br>OR<br>≥30% of test animals respond at >1% intradermal induction concentration | ≥30% of test animals respond at ≤0.1% intradermal induction concentration<br>OR<br>≥60% of test animals respond at >0.1% to ≤1% intradermal induction concentration |
| Buehler      | No positive response or low incidence | ≥60% of test animals respond at >0.2 to ≤20% topical induction concentration<br>OR<br>≥15% of test animals respond at >20% topical induction concentration   | ≥15% of test animals respond at ≤0.2% topical induction concentration<br>OR<br>≥60% respond at any topical induction concentration                                  |

**GPMT:** guinea pig maximization test; **LLNA EC3:** local lymph node assay effective concentration required to produce a three-fold increase in the stimulation index compared to vehicle-treated controls

**Table S7.** Draft NIOSH Tier 2 Banding Criteria: Genotoxicity

|                      | Endpoint Band |       |          |
|----------------------|---------------|-------|----------|
|                      | A             | C     | D        |
| Genotoxicity Results | Negative      | Mixed | Positive |

# Application of the NIOSH occupational exposure banding process to Bisphenol A: A case study

**Table S8.** Draft NIOSH Tier 2 Banding Criteria: Carcinogenicity

| Quantitative                                             | Endpoint Band                                                                                         |                     |                                                                |                                                                                                                 |
|----------------------------------------------------------|-------------------------------------------------------------------------------------------------------|---------------------|----------------------------------------------------------------|-----------------------------------------------------------------------------------------------------------------|
|                                                          | A                                                                                                     | C                   | D                                                              | E                                                                                                               |
| Potency Factor                                           | A                                                                                                     | C                   | D                                                              | E                                                                                                               |
| Slope Factor, (mg/kg-day) <sup>-1</sup>                  | NA                                                                                                    | <0.01               | ≥0.01 to <10                                                   | ≥10                                                                                                             |
| Inhalation risk unit, (μg/m <sup>3</sup> ) <sup>-1</sup> | NA                                                                                                    | <3x10 <sup>-6</sup> | ≥3x10 <sup>-6</sup> to <0.01                                   | ≥0.01                                                                                                           |
| TD <sub>05</sub> , mg/kg-day                             | NA                                                                                                    | >5                  | >0.005 to ≤5                                                   | ≤0.005                                                                                                          |
| TC <sub>05</sub> (μg/m <sup>3</sup> )                    | NA                                                                                                    | >16,700             | >5 to 16,700                                                   | ≤5                                                                                                              |
| Qualitative                                              |                                                                                                       |                     |                                                                |                                                                                                                 |
| NTP Report on Carcinogens                                | NA                                                                                                    | NA                  | NA                                                             | 1) Known to be a human carcinogen<br>2) Reasonably anticipated to be a human carcinogen                         |
| EPA IRIS <sup>A</sup>                                    | 1) Group E (evidence of non-carcinogenicity for humans)<br>2) Not likely to be carcinogenic to humans | NA                  | 1) Group C<br>2) Suggestive evidence of carcinogenic potential | 1) Group A<br>2) Carcinogenic to humans<br>3) Group B1<br>4) Group B2<br>5) Likely to be carcinogenic to humans |
| IARC <sup>B</sup>                                        | Group 4                                                                                               | NA                  | NA                                                             | 1) Group 1<br>2) Group 2A<br>3) Group 2B                                                                        |
| State of California OEHHA                                | NA                                                                                                    | NA                  | NA                                                             | Type of toxicity=cancer                                                                                         |

**Group 1:** carcinogenic to humans; **Group 2A:** probably carcinogenic to humans; **Group A:** human carcinogen; **Group 2B:** possibly carcinogenic to humans; **Group 4:** probably not carcinogenic to humans; **Group B1:** probable human carcinogen; **Group B2:** probable human carcinogen; **Group C:** possible human carcinogen; **IARC:** International Agency for Research on Cancer; **NA:** not applicable; **NTP:** National Toxicology Program; **OEHHA:** Office of Environmental Health Hazard Assessment; **TD:** tumorigenic dose

<sup>A</sup>Group D (not classifiable as to human carcinogenicity) and category “data are inadequate for an assessment of carcinogenic potential”, no band assigned.

<sup>B</sup>Group 3 (no classifiable as to its carcinogenicity to humans), no band assigned.

**Table S9.** Draft NIOSH Tier 2 Banding Criteria: Reproductive Toxicity

| Exposure/Dosing Route                          | Endpoint Band |                   |                |             |      |
|------------------------------------------------|---------------|-------------------|----------------|-------------|------|
|                                                | A             | B                 | C              | D           | E    |
| Oral, Dermal, mg/kg-day                        | >300          | >30 to ≤300       | >3 to ≤30      | >0.3 to ≤3  | ≤0.3 |
| Inhalation, gases and vapors, ppm              | >10,000       | >1,000 to ≤10,000 | >100 to ≤1,000 | >10 to ≤100 | ≤10  |
| Inhalation, dusts and mists, μg/m <sup>3</sup> | >10,000       | >1,000 to ≤10,000 | >100 to ≤1,000 | >10 to ≤100 | ≤10  |

# Application of the NIOSH occupational exposure banding process to Bisphenol A: A case study

**Table S10.** Draft NIOSH Tier 2 Banding Criteria: Specific Target Organ Toxicity-Repeated Exposure

| Exposure/Dosing Route                             | Endpoint Band |                   |                |             |     |
|---------------------------------------------------|---------------|-------------------|----------------|-------------|-----|
|                                                   | A             | B                 | C              | D           | E   |
| Oral, Dermal,<br>mg/kg-day                        | >1,000        | >100 to ≤1,000    | >10 to ≤100    | >1 to ≤10   | ≤1  |
| Inhalation, gases and vapors,<br>ppm              | >30,000       | >3,000 to ≤30,000 | >300 to ≤3,000 | >30 to ≤300 | ≤30 |
| Inhalation, dusts and mists,<br>μg/m <sup>3</sup> | >30,000       | >3,000 to ≤30,000 | >300 to ≤3,000 | >30 to ≤300 | ≤30 |

**Table S11.** Endpoint Determinant Scores (EDS) Associated with Health Effect Endpoints under Draft NIOSH Tier 2

| Endpoint                                           | EDS if Adequate Data Available <sup>A</sup> |
|----------------------------------------------------|---------------------------------------------|
| Acute Toxicity                                     | 5                                           |
| Skin Corrosion/Irritation                          | 5                                           |
| Eye Damage/Irritation                              | 5                                           |
| Respiratory Sensitization                          | 10                                          |
| Skin Sensitization                                 | 5                                           |
| Genotoxicity                                       | 5                                           |
| Carcinogenicity<br>Quantitative                    | 30                                          |
| Qualitative                                        | 20 or 30 <sup>B</sup>                       |
| Reproductive Toxicity                              | 30                                          |
| Specific Target Organ Toxicity – Repeated Exposure | 30                                          |

<sup>A</sup>If adequate data are not available, endpoint determinant score is 0.

<sup>B</sup>See Table 3-7 in: National Institute for Occupational Safety and Health (NIOSH): The NIOSH Occupational Exposure Banding Process: Guidance for the Evaluation of Chemical Hazards, External Review Draft. March 8, 2017. Available at: <https://www.regulations.gov/document?D=CDC-2017-0028-0002> (accessed 17 Aug 2018).
